# Supplementary material for: Light-Dependence of Formate (C1) and Acetate (C2) Transport and Oxidation in Poplar Trees
Source: MDPI journal article supplement (doi:10.3390/plants11162080), 2022-08-09
Supplement: s1 [file s1]

## Supplementary Material

### Light-dependence of Formate (C<sub>1</sub>) and Acetate (C<sub>2</sub>) Transport and Oxidation in Poplar Trees

Kolby J. Jardine <sup>1,\*</sup>, Joseph Lei <sup>1</sup>, Suman Som<sup>1</sup>, Daisy Souza <sup>2</sup>, Chaevien S. Clendinen <sup>3</sup>, Hardeep Mehta <sup>3</sup>, Pubudu Handakumbura <sup>3</sup>, Markus Bill <sup>1</sup>, Robert P. Young <sup>3</sup>

1\*. Climate and Ecosystem Science Division, Lawrence Berkeley National Laboratory, Berkeley, CA, USA; [kjjardine@lbl.gov](mailto:kjjardine@lbl.gov)

2. Forest Management Laboratory, National Institute for Amazon Research, Manaus, Brazil

3. Environmental Molecular Sciences Laboratory, Pacific Northwest National Laboratory, Richland, WA, USA

### *Supplementary Information Content*

***Supplementary Figure S1:*** Time series of headspace  $\delta^{13}\text{CO}_2$  in a dynamic poplar branch enclosure during a DXSI experiment using a 10 mM solution of [<sup>13</sup>C]formate.

***Supplementary Figure S2:*** Time series of headspace  $\delta^{13}\text{CO}_2$  in a dynamic poplar branch enclosure during a DXSI experiment using a 10 mM solution of [<sup>13</sup>C]formate which is subsequently switched to a 50 mM solution of [<sup>13</sup>C]formate.

## Supplementary Figures

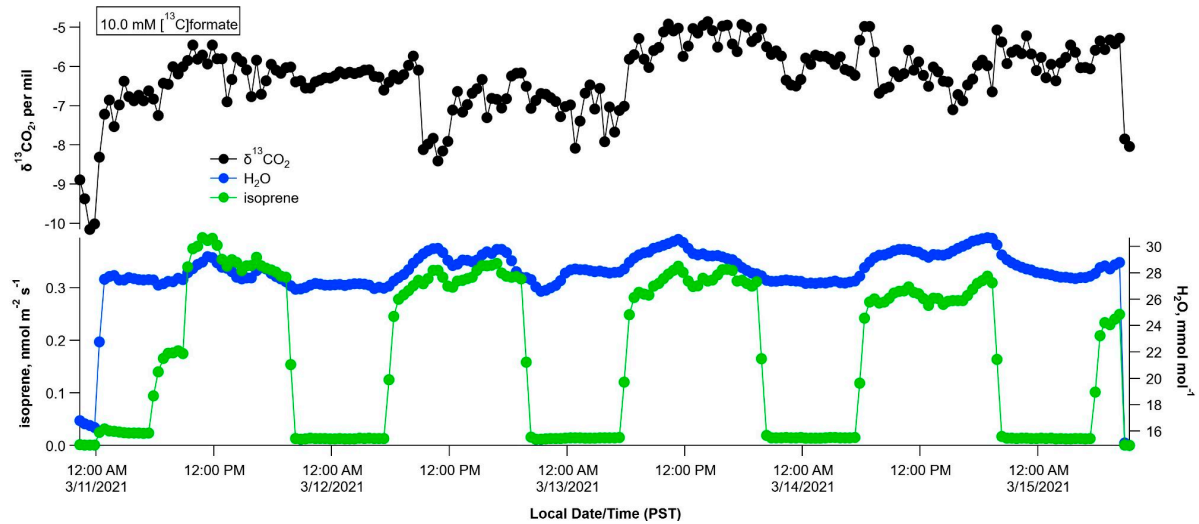

**Figure S1:** Time series of headspace H<sub>2</sub>O water vapor concentrations, isoprene emissions, and headspace with  $\delta^{13}\text{CO}_2$  in a dynamic poplar branch enclosure during a DXSI experiment using a 10 mM solution of [<sup>13</sup>C]formate. The first and last part of the time series is an empty branch chamber.

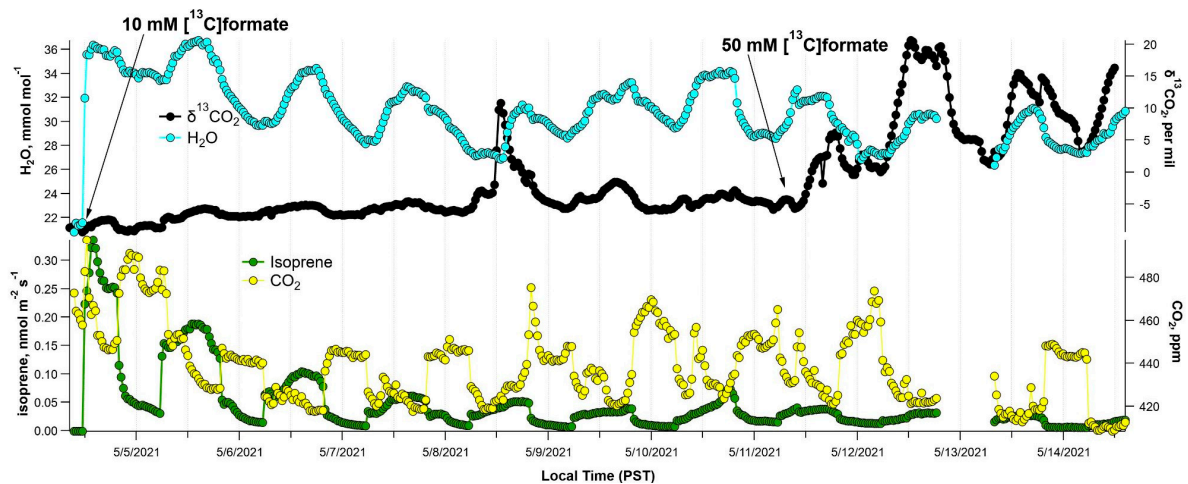

**Figure S2:** Time series of headspace H<sub>2</sub>O water vapor concentrations, isoprene emissions, and headspace with  $\delta^{13}\text{CO}_2$  in a dynamic poplar branch enclosure during a DXSI experiment using a 10 mM solution of [<sup>13</sup>C]formate which is switched to a 50 mM solution of [<sup>13</sup>C]formate (indicated by arrow). The first part of the time series is an empty branch chamber.
